# Supplementary material for: Randomized immunotherapy trial in dual‐allergic patients using “active allergen placebo” as control
Source: PubMed Central journal article supplement (PMC6773203; doi:10.1111/all.13842), 2019-05-28
Supplement: ALL-74-1480-s001.pdf [file ALL-74-1480-s001.pdf]

## Supporting information

|                                                                                                                                                  |    |
|--------------------------------------------------------------------------------------------------------------------------------------------------|----|
| Allergen challenge chamber (ACC) technical details .....                                                                                         | 2  |
| Skin prick test (SPT) technical details .....                                                                                                    | 3  |
| Immunological profile.....                                                                                                                       | 3  |
| Peak expiratory flow (safety outcome) .....                                                                                                      | 4  |
| Table S1 – Peak expiratory flow for patients with controlled asthma (N=27, safety set).....                                                      | 4  |
| Table S2 – Peak expiratory flow for all patients (N=95, safety set).....                                                                         | 4  |
| Change in birch/grass IgG <sub>4</sub> .....                                                                                                     | 5  |
| Figure S1 – Box-plots of targeted and untargeted effects of allergen immunotherapy on specific IgG <sub>4</sub> values (full analysis set) ..... | 5  |
| Figure S1a – Individual patient’s values of grass/birch IgG <sub>4</sub> in grass AIT group.....                                                 | 6  |
| Figure S1b – Individual patient’s values of grass/birch IgG <sub>4</sub> in birch AIT group.....                                                 | 7  |
| Targeted vs untargeted treatment effects (individual values).....                                                                                | 8  |
| Figure S2a – Individual patient’s total nasal symptom scores in grass AIT group.....                                                             | 8  |
| Figure S2b – Individual patient’s total nasal symptom scores in birch AIT group.....                                                             | 9  |
| Figure S2c – Treatment effect between-groups in individual patient’s values.....                                                                 | 10 |
| Figure S2d – Treatment effect within-groups in individual patient’s values .....                                                                 | 11 |

**Allergen challenge chamber (ACC) technical details**

The grass pollen atmosphere was created in the validated ACC according to standardized operating procedures of the Fraunhofer-ITEM (Hannover, Germany). The airflow through the chamber was 1,500 m<sup>3</sup>/h. The chamber was charged with indoor air, which was cleaned, temperature-controlled, dried, and then loaded with a qualitatively and quantitatively determined allergen load. Allergen concentration, temperature, and humidity were continuously monitored, allowing for a constant humidity (40% [ $\pm 10\%$ ]), temperature (21°C [ $\pm 2^\circ\text{C}$ ]), and a predefined allergen load (expressed as grains per cubic meter) to be maintained throughout the exposure period of 2 hours. The pollen concentration in the ACC (4,000 grains per cubic meter  $\pm 30\%$ ) was continuously measured via a particle counter (Boulder Counter) and discontinuously assessed by taking 2 samples (1 sample after half of the challenge duration, and 1 sample after the challenge was completed) on a pollen sampler (ROTOROD) followed by counting the pollen under the microscope.

### Skin prick test (SPT) technical details

A routine SPT was carried out to allow an objective assessment of the sensitization of the patients. SPT was performed using test solutions provided by the sponsor, even if a recent SPT was available for the patient. Concomitant medication had to be checked for interference with SPT and discontinued prior to its conduct. If the Screening Visit took place during a pollen season (birch or grass), the SPT had to be postponed if the patient showed severe acute allergic symptoms. In this case, the optional visit was to be scheduled at a later time point, when the patient was free of symptoms.

For the assessment of the SPT results the following rules were considered:

- For test validity, the positive control was acceptable if the wheal size was  $\geq 3$  mm.
- For the negative control, the skin reaction was judged as being negative if the wheal was  $\leq 2$  mm.
- For the different allergen test solutions, the result was considered to be positive if the wheal size was  $\geq 3$  mm.

The SPT was performed with the following test solutions (Allergopharma GmbH & Co. KG, Reinbek / Hamburg, Germany):

- Negative control: physiological saline solution (0.9% NaCl).
- Positive control: 0.1% histamine dihydrochloride (histamine 1 + 999, histamine dihydrochloride 1.7 mg/mL).
- Birch (108 Birch; 50,000 SBU [standardized biological units]/mL).
- Allergen extracts from a mixture of 6 grasses (006 Grasses: 133 *Holcus lanatus*, 140 *Dactylis glomerata*, 157 *Lolium perenne*, 177 *Phleum pratense*, 178 *Poa pratensis*, and 179 *Festuca pratensis*; 50,000 SBU/mL).
- Alder (115 Alder; 50,000 BU [biological units]/mL).
- Hazel (129 Hazel; 50,000 BU/mL).
- House dust mites (708 *Dermatophagoides [D.] farinae*; 50,000 BU/mL).
- House dust mites (725 *D. pteronyssinus*; 50,000 SBU/mL).

### Immunological profile

At Screening Visit, the immunological profile was assessed, including the following parameters:

- Total immunoglobulin E (IgE).
- Specific IgE Grass mix, IgE Birch, IgE Ragweed, IgE Mugwort, IgE Plantain, IgE Alder, IgE Hazel, IgE *D. pteronyssinus d1*, IgE *D. farinae d2*, IgE Dog, and IgE Cat.
- Specific immunoglobulin G<sub>4</sub> (IgG<sub>4</sub>) timothy grass and IgG<sub>4</sub> birch.

At Final Visit:

- Specific IgG<sub>4</sub> timothy grass and IgG<sub>4</sub> birch.

## Peak expiratory flow (safety outcome)

**Table S1 – Peak expiratory flow for patients with controlled asthma (N=27, safety set)**

| Patients with controlled asthma (GINA, 2012) |           | Grass AIT (N=10) |                                | Birch AIT (N=17) |                                | Overall (N=27) |                                |
|----------------------------------------------|-----------|------------------|--------------------------------|------------------|--------------------------------|----------------|--------------------------------|
|                                              |           | PEF (L/min)      | Predicted PEF (%) <sup>a</sup> | PEF (L/min)      | Predicted PEF (%) <sup>a</sup> | PEF (L/min)    | Predicted PEF (%) <sup>a</sup> |
| <b>Baseline</b>                              | n         | 10               | 10                             | 17               | 17                             | 27             | 27                             |
|                                              | Mean (SD) | 525 (120)        | 102 (10)                       | 490 (125)        | 98 (12)                        | 503 (122)      | 99 (11)                        |
|                                              | 95% CI    | 439 – 611        | 94 – 109                       | 425 – 554        | 92 – 104                       | 454 – 551      | 95 – 104                       |
| <b>Final Visit</b>                           | n         | 10               | 10                             | 17               | 17                             | 27             | 27                             |
|                                              | Mean (SD) | 518 (94)         | 101 (12)                       | 481 (137)        | 96 (12)                        | 495 (122)      | 98 (12)                        |
|                                              | 95% CI    | 451 – 585        | 93 – 110                       | 411 – 552        | 90 – 102                       | 446 – 543      | 93 – 103                       |
| <b>Final Visit - Baseline</b>                | n         | 10               | 10                             | 17               | 17                             | 27             | 27                             |
|                                              | Mean (SD) | -7.0 (46.7)      | -0.1 (8.9)                     | -8.4 (57.1)      | -1.9 (10.3)                    | -7.9 (52.6)    | -1.2 (9.7)                     |
|                                              | 95% CI    | -40.4 – 26.4     | -6.5 – 6.3                     | -37.7 – 21.0     | -7.1 – 3.4                     | -28.7 – 12.9   | -5.0 – 2.6                     |

<sup>a</sup>Percentage of predicted value according to European Community for Steel and Coal

AIT = allergen immunotherapy; CI = confidence interval; GINA = Global Initiative for Asthma; N = number of patients; n = number of patients with data; PEF = peak expiratory flow; SD = standard deviation.

**Table S2 – Peak expiratory flow for all patients (N=95, safety set)**

| All Patients                  |           | Grass AIT (N=47) |                                | Birch AIT (N=48) |                                | Overall (N=95) |                                |
|-------------------------------|-----------|------------------|--------------------------------|------------------|--------------------------------|----------------|--------------------------------|
|                               |           | PEF (L/min)      | Predicted PEF (%) <sup>a</sup> | PEF (L/min)      | Predicted PEF (%) <sup>a</sup> | PEF (L/min)    | Predicted PEF (%) <sup>a</sup> |
| <b>Baseline</b>               | n         | 47               | 47                             | 48               | 48                             | 95             | 95                             |
|                               | Mean (SD) | 514 (107)        | 102 (11)                       | 499 (120)        | 101 (11)                       | 507 (113)      | 102 (11)                       |
|                               | 95% CI    | 483 – 546        | 99 – 106                       | 464 – 534        | 98 – 104                       | 484 – 530      | 100 – 104                      |
| <b>Final Visit</b>            | n         | 28               | 28                             | 34               | 34                             | 62             | 62                             |
|                               | Mean (SD) | 493 (97)         | 98 (11)                        | 498 (127)        | 102 (13)                       | 495 (113)      | 100 (12)                       |
|                               | 95% CI    | 455 – 530        | 94 – 103                       | 453 – 542        | 97 – 106                       | 467 – 524      | 97 – 103                       |
| <b>Final Visit - Baseline</b> | n         | 28               | 28                             | 34               | 34                             | 62             | 62                             |
|                               | Mean (SD) | -10.4 (36.7)     | -1.5 (6.9)                     | 6.1 (56.6)       | 1.6 (11.6)                     | -1.3 (49.0)    | 0.2 (9.8)                      |
|                               | 95% CI    | -24.6 – 3.9      | -4.1 – 1.2                     | -13.6 – 25.9     | -2.5 – 5.6                     | -13.8 – 11.1   | -2.3 – 2.7                     |

<sup>a</sup>Percentage of predicted value according to European Community for Steel and Coal

AIT = allergen immunotherapy; CI = confidence interval; N = number of patients; n = number of patients with data; PEF = peak expiratory flow; SD = standard deviation.

## Change in birch/grass IgG<sub>4</sub>

**Figure S1 – Box-plots of targeted and untargeted effects of allergen immunotherapy on specific IgG<sub>4</sub> values (full analysis set)**

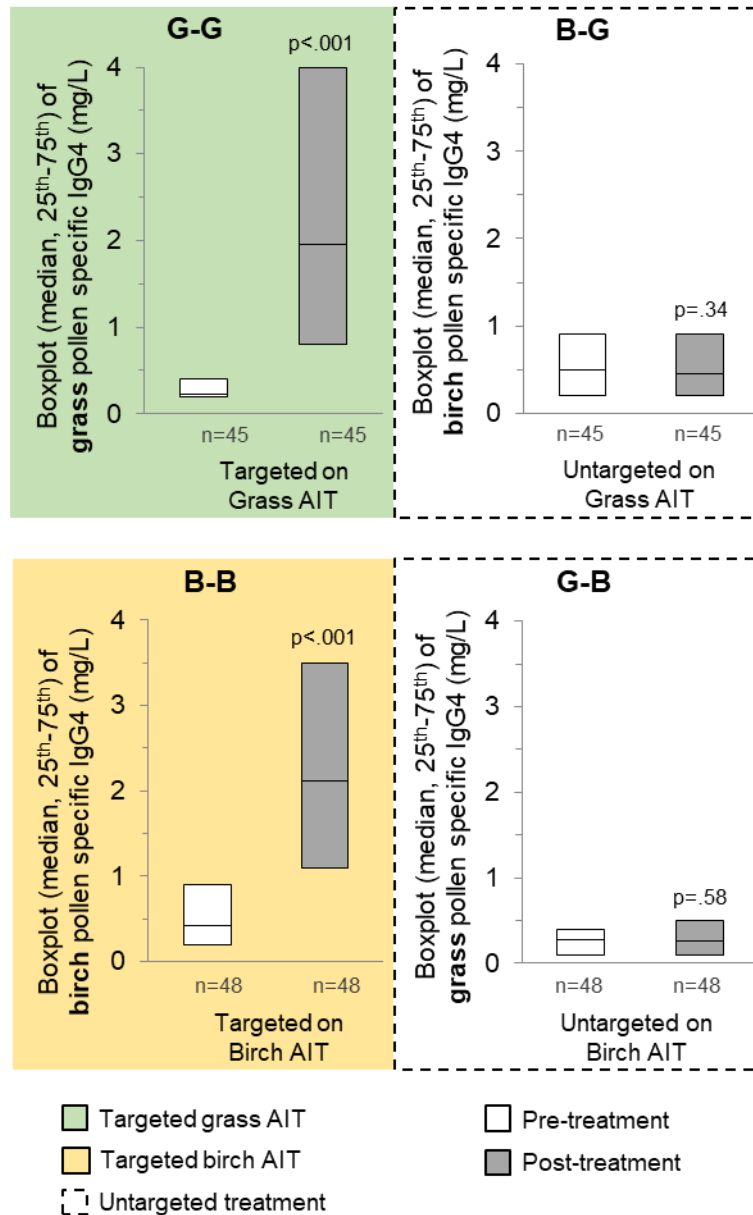

p-value from 2-sided Wilcoxon signed rank test.

Results for the per-protocol set analysis were similar to full analysis set.

AIT = allergen immunotherapy; **B-B** = birch-on-birch treatment effect (targeted);

**B-G** = birch-on-grass treatment effect (untargeted); **G-B** = grass-on-birch treatment effect

(untargeted); **G-G** = grass-on-grass treatment effect (targeted); IgG<sub>4</sub> = immunoglobulin G<sub>4</sub>;

n = number of patients with data.

Figure S1a – Individual patient's values of grass/birch IgG<sub>4</sub> in grass AIT group

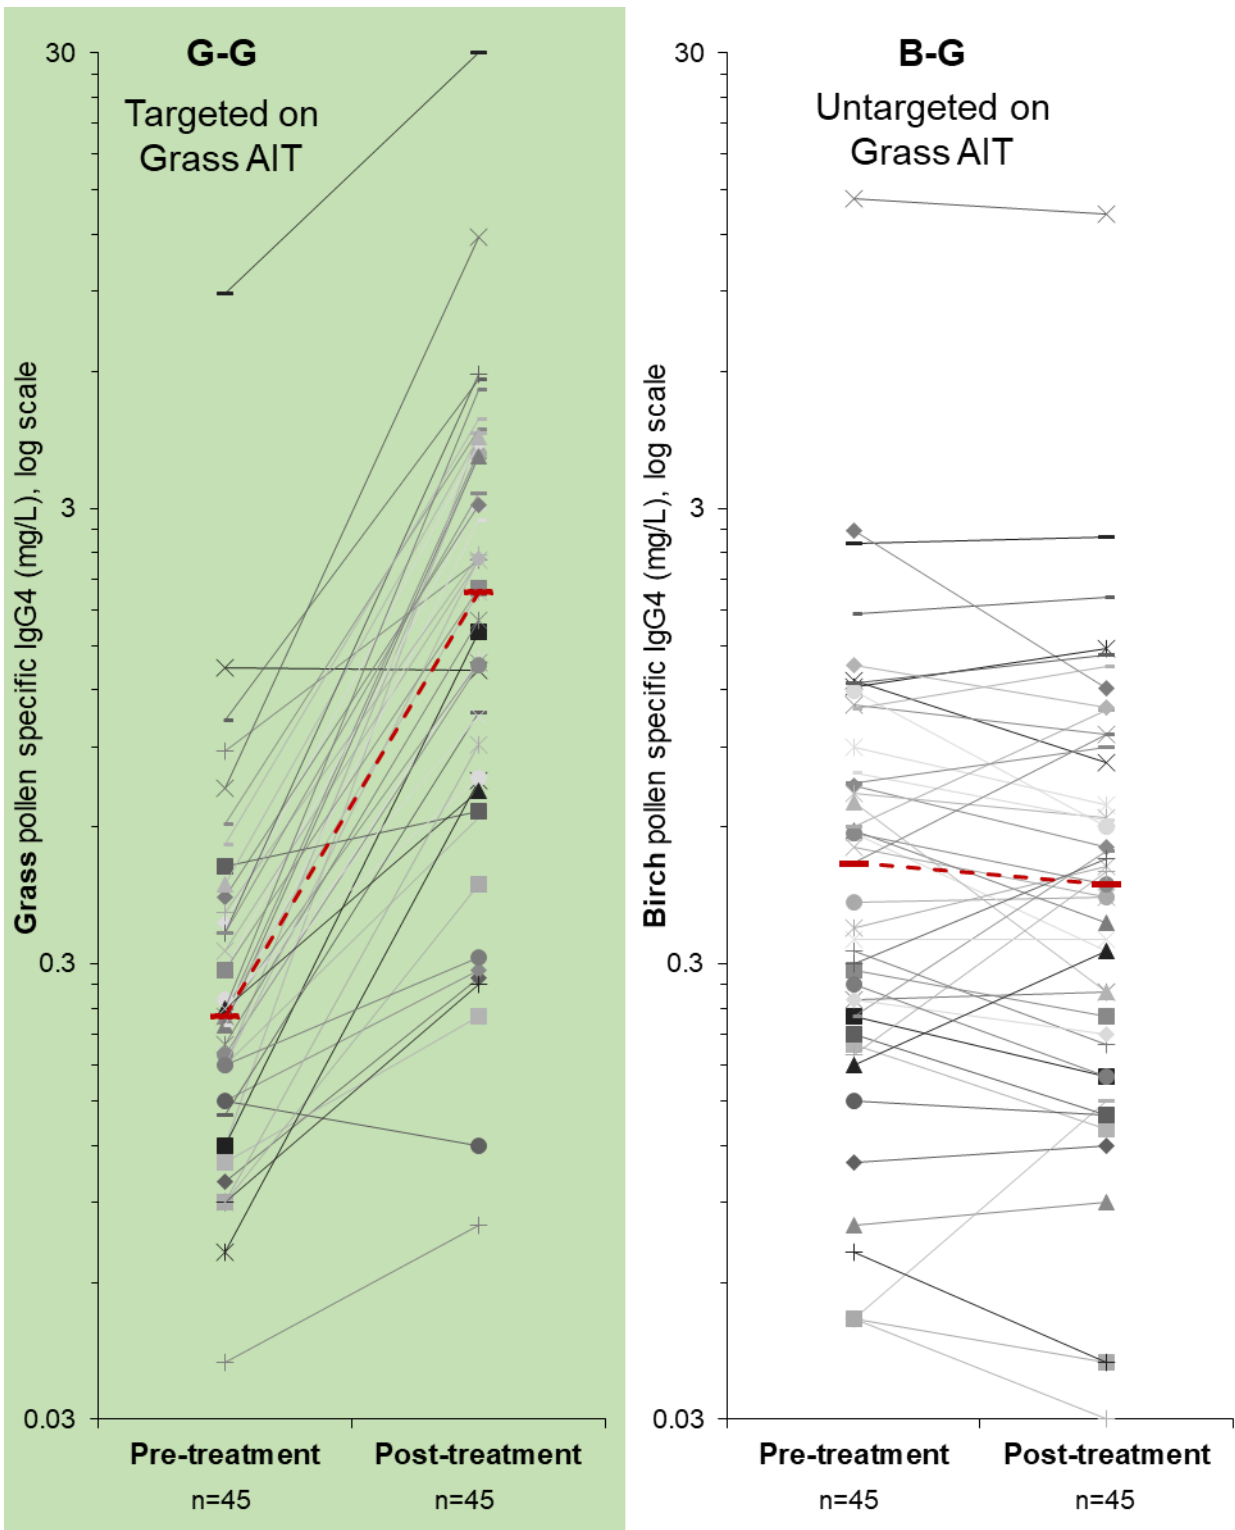

Pre- and post-treatment values are connected by a line for each patient.

Red markers and red dashed line represent median values.

AIT = allergen immunotherapy; **B-G** = birch-on-grass treatment effect; **G-G** = grass-on-grass treatment effect; IgG<sub>4</sub> = immunoglobulin G<sub>4</sub>; n = number of patients with data.

Figure S1b – Individual patient's values of grass/birch IgG4 in birch AIT group

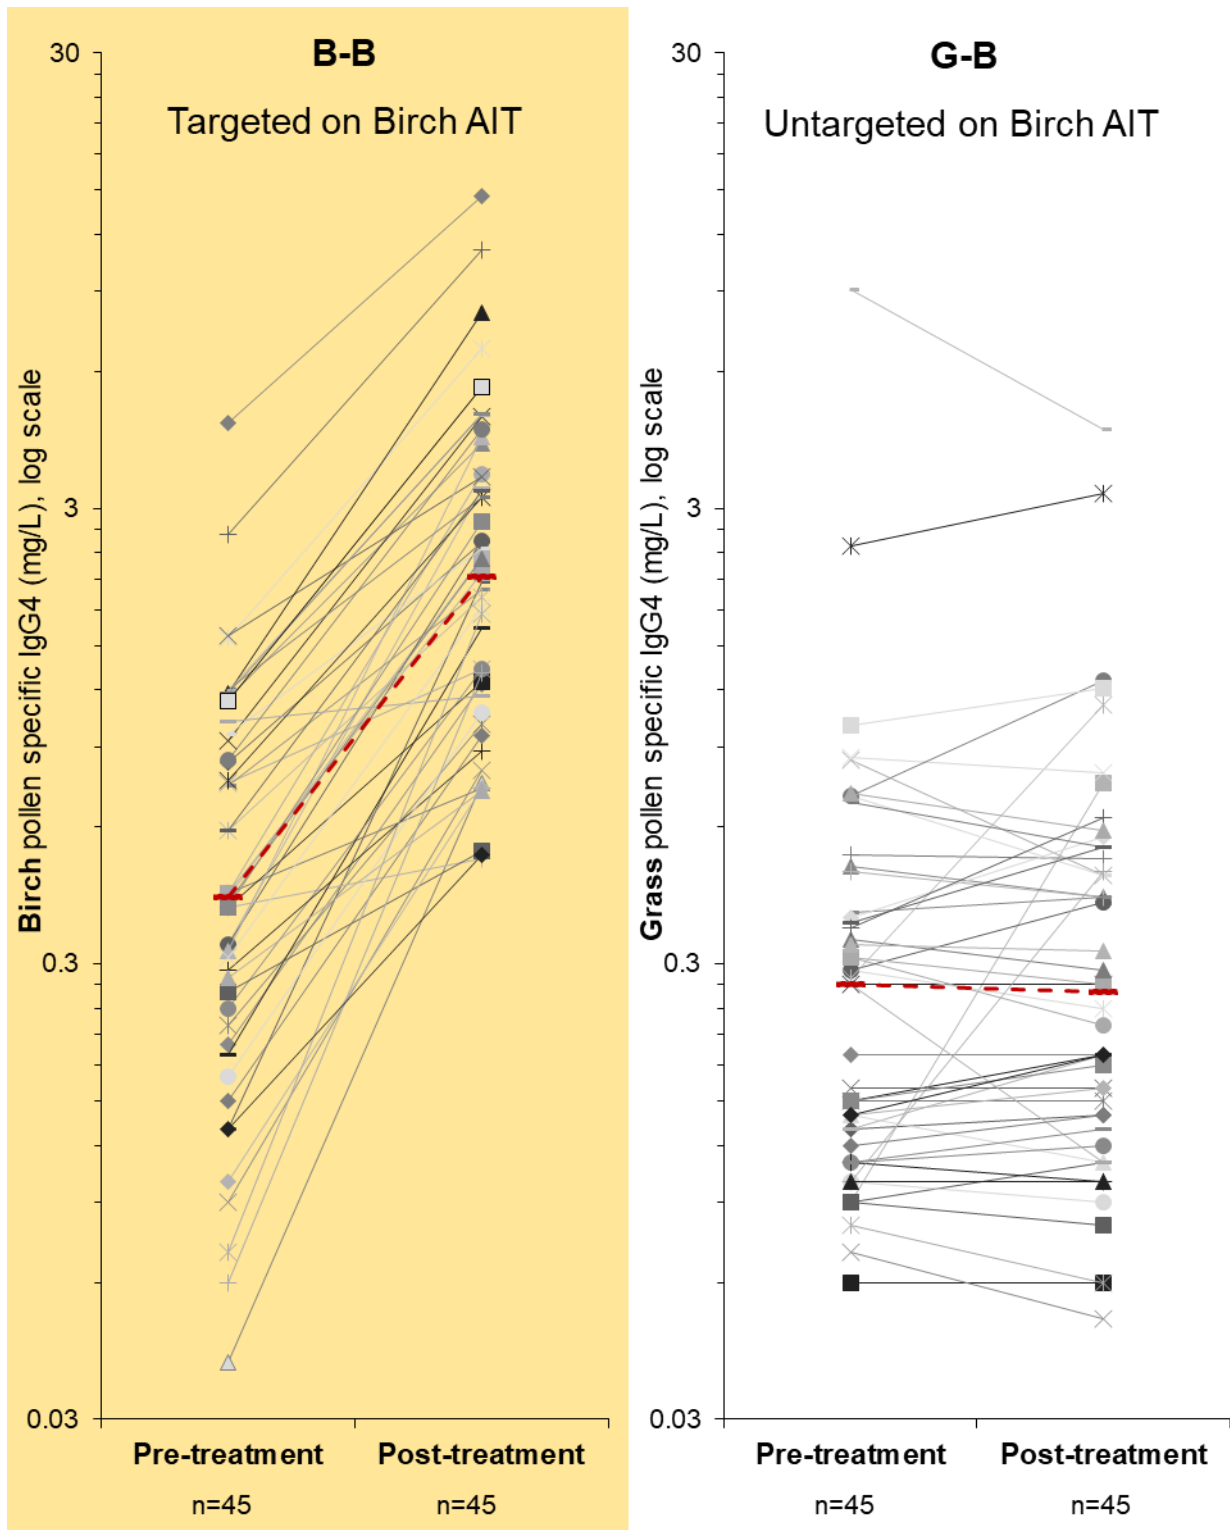

Pre- and post-treatment values are connected by a line for each patient.

Red markers and red dashed line represent median values.

AIT = allergen immunotherapy; **B-B** = birch-on-birch treatment effect; **G-B** = grass-on-birch treatment effect; IgG<sub>4</sub> = immunoglobulin G<sub>4</sub>; n = number of patients with data.

## Targeted vs untargeted treatment effects (individual values)

Figure S2a – Individual patient's total nasal symptom scores in grass AIT group

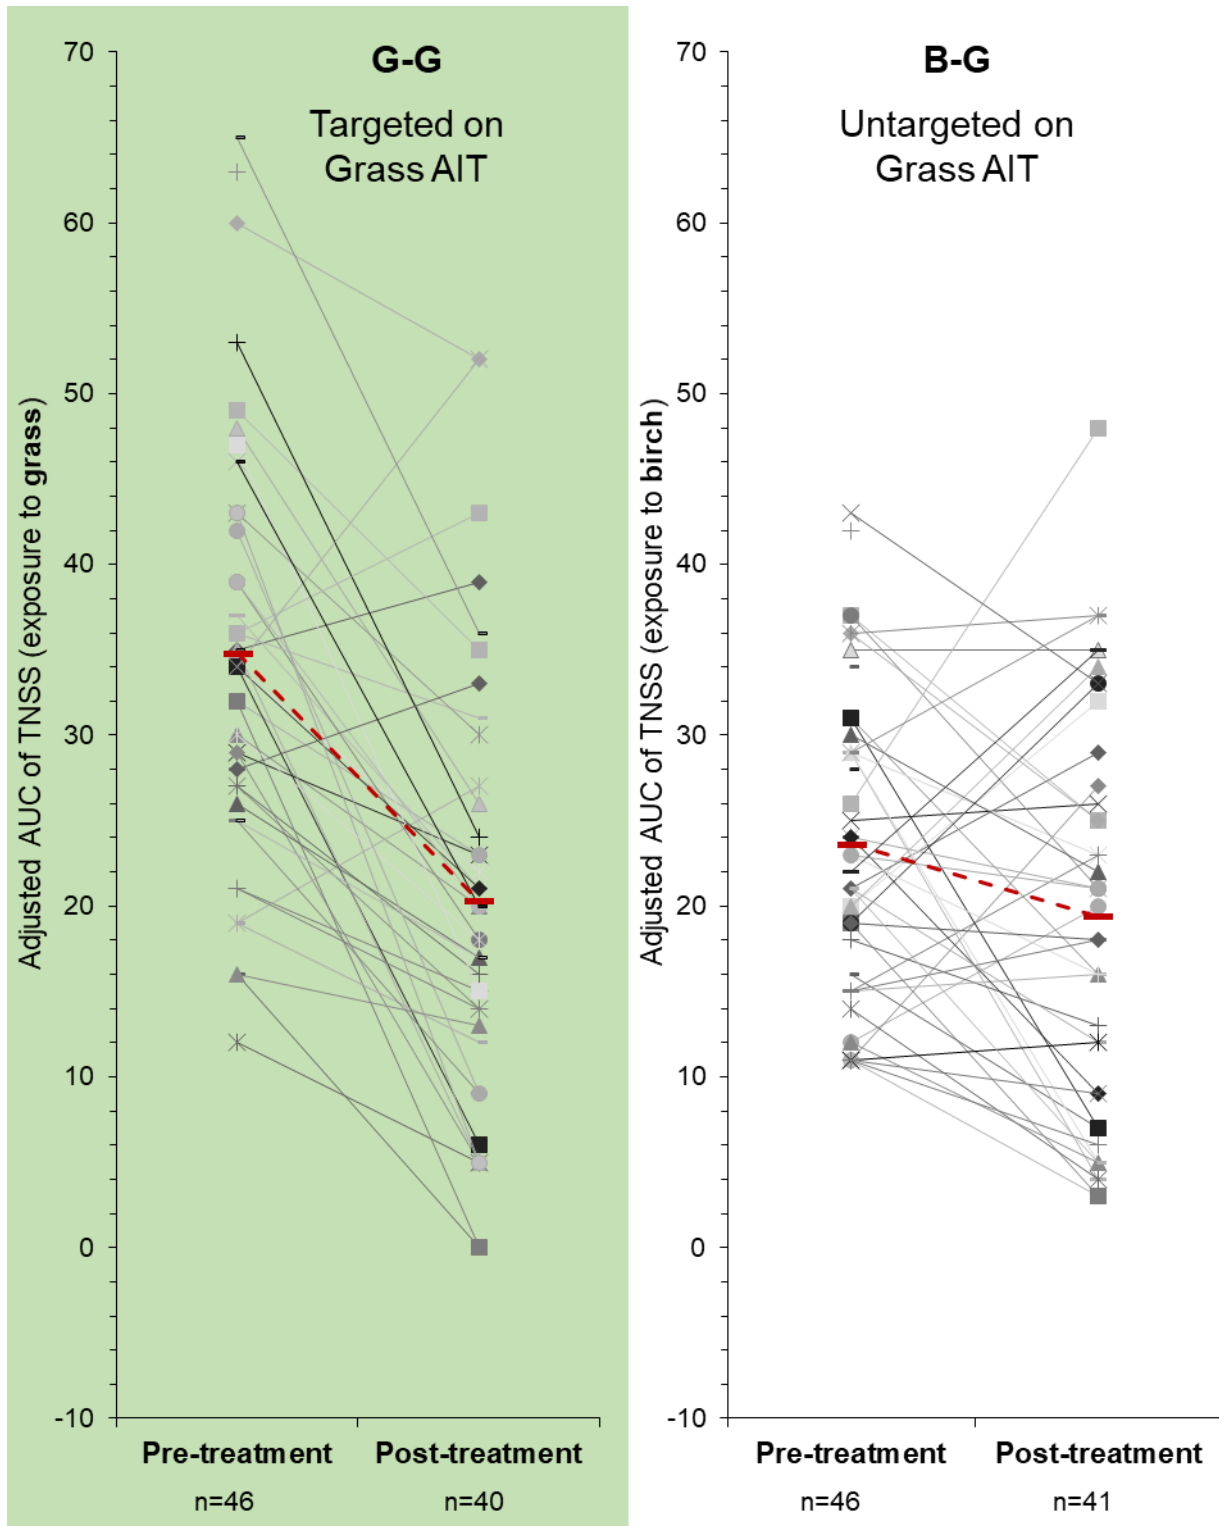

Pre- and post-treatment values are connected by a line for each patient.

Red markers and red dashed line represent mean values.

AIT = allergen immunotherapy; AUC = area under the curve; **B-G** = birch-on-grass treatment effect; **G-G** = grass-on-grass treatment effect; n = number of patients with data; TNSS = total nasal symptom score.



**Figure S2b – Individual patient’s total nasal symptom scores in birch AIT group**

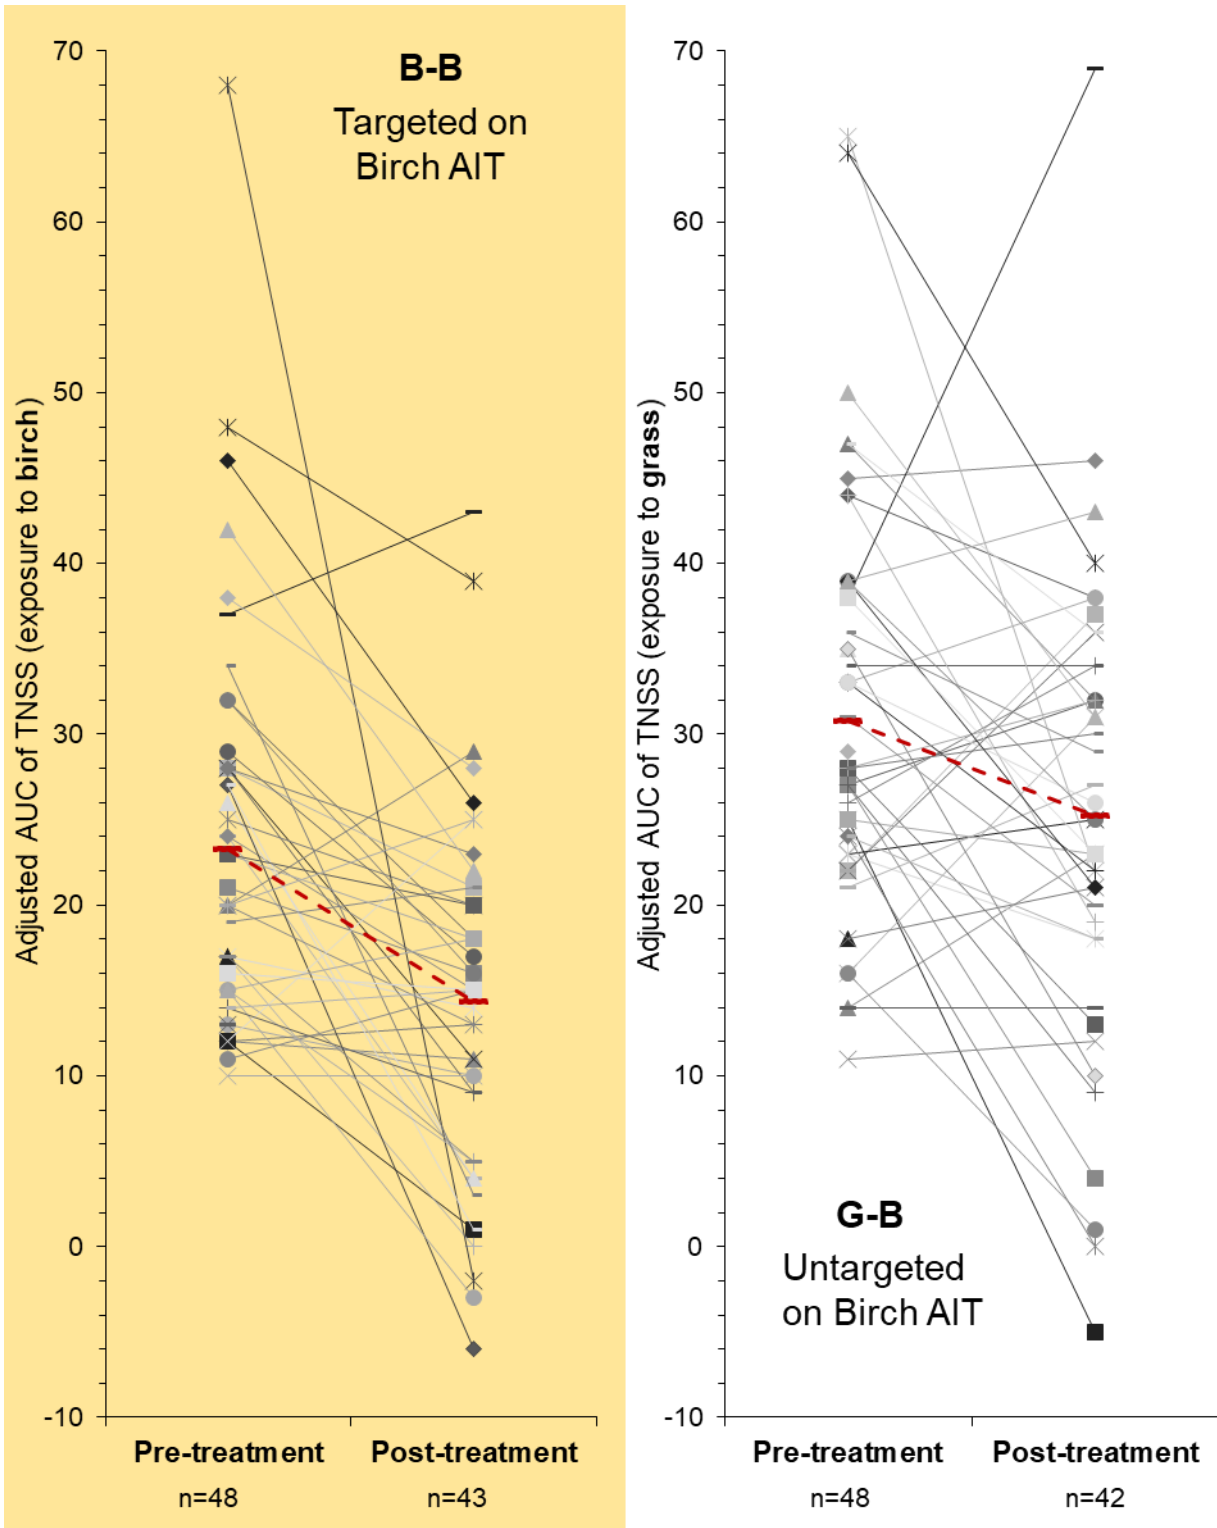

Pre- and post-treatment values are connected by a line for each patient.

Red markers and red dashed line represent mean values.

AIT = allergen immunotherapy; AUC = area under the curve; **B-B** = birch-on-birch treatment effect; **G-B** = grass-on-birch; IgG<sub>4</sub> = immunoglobulin G<sub>4</sub>; n = number of patients; TNSS = total nasal symptom score.

**Figure S2c – Treatment effect between-groups in individual patient’s values**

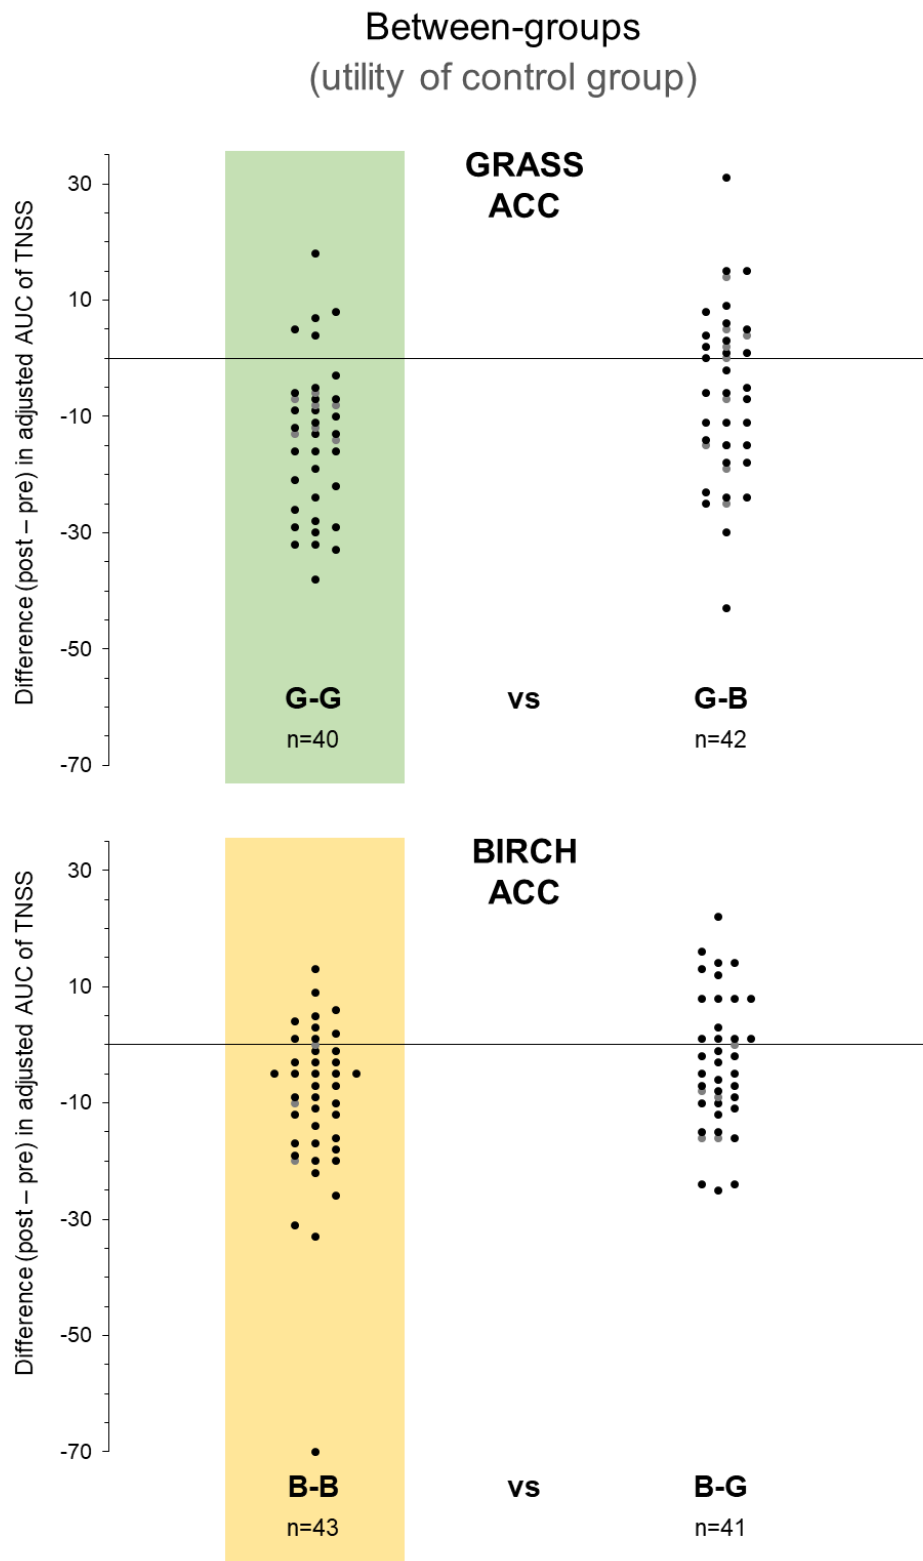

Dots (black mostly/grey when overlapping) represent individual patient values.

AUC = area under the curve; **B-B** = birch-on-birch treatment effect (targeted); **B-G** = birch-on-grass treatment effect (untargeted); **G-B** = grass-on-birch treatment effect (untargeted);

**G-G** = grass-on-grass treatment effect (targeted); n = number of patients with data; TNSS = total nasal symptom score.

**Figure S2d – Treatment effect within-groups in individual patient's values**

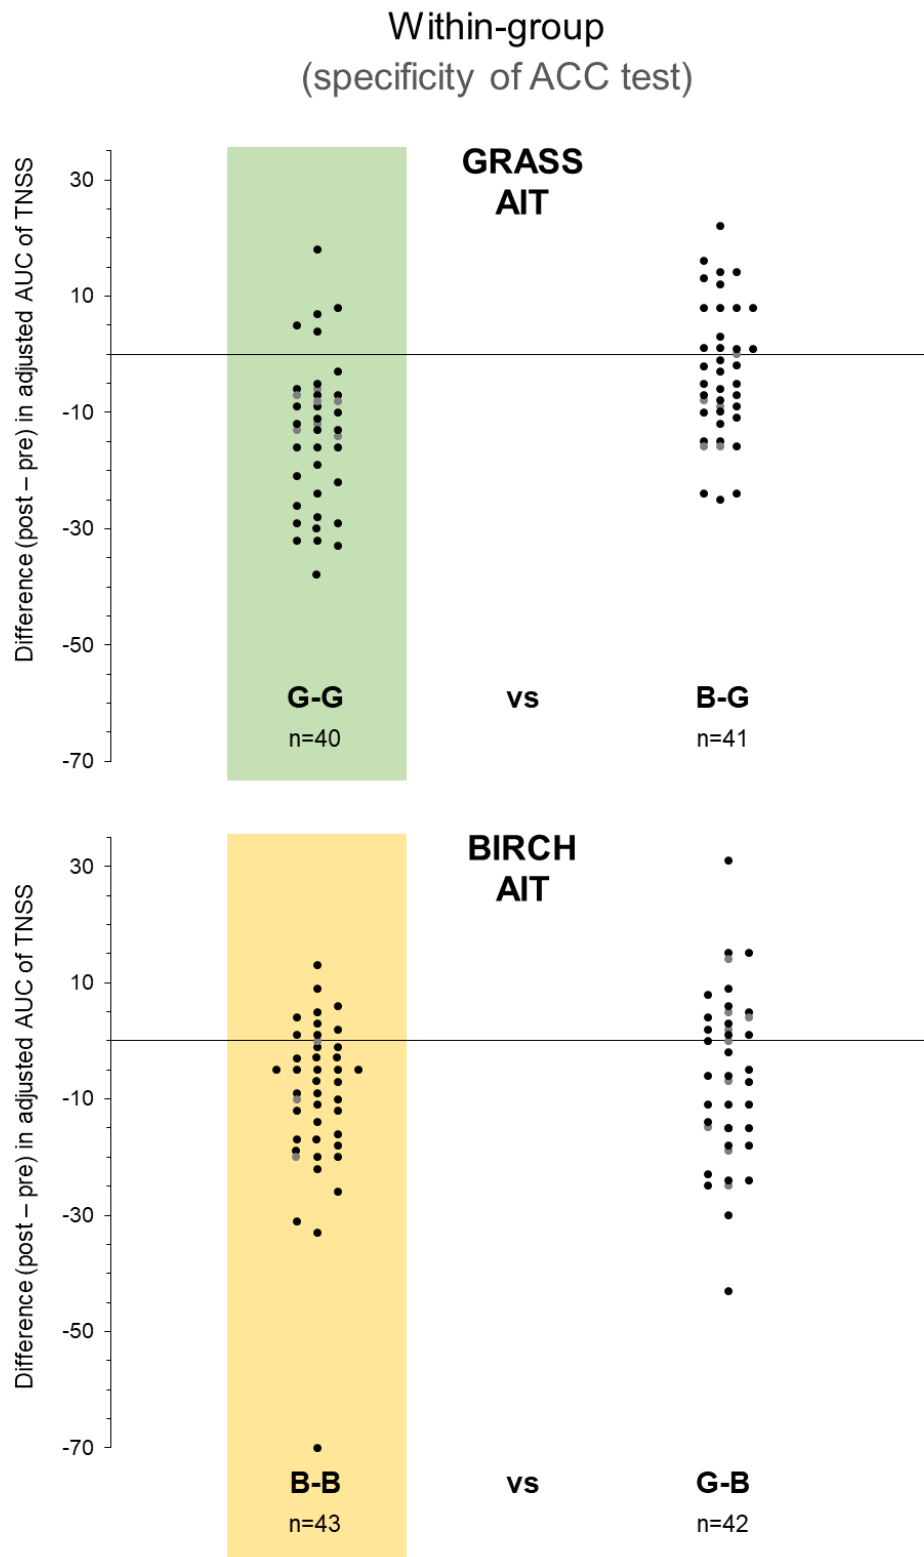

Dots (black mostly/grey when overlapping) represent individual patient values.

ACC = allergen challenge chamber; AIT = allergen immunotherapy; AUC = area under the curve;

**B-B** = birch-on-birch treatment effect (targeted); **B-G** = birch-on-grass treatment effect

(untargeted); **G-B** = grass-on-birch treatment effect (untargeted); **G-G** = grass-on-grass treatment

effect (targeted); n = number of patients with data.
